# Supplementary material for: Fatty Acid Modification of the Anticancer Peptide LVTX-9 to Enhance Its Cytotoxicity against Malignant Melanoma Cells
Source: MDPI journal article supplement (doi:10.3390/toxins13120867), 2021-12-04
Supplement: s1 [file s1]

# Supplementary Materials: Fatty Acid Modification of the Anticancer Peptide LVTX-9 to Enhance Its Cytotoxicity against Malignant Melanoma Cells

Fengjiao Li, Saizhi Wu, Ninglin Chen, Jingyu Zhu, Xinxin Zhao, Peng Zhang, Youlin Zeng and Zhonghua Liu

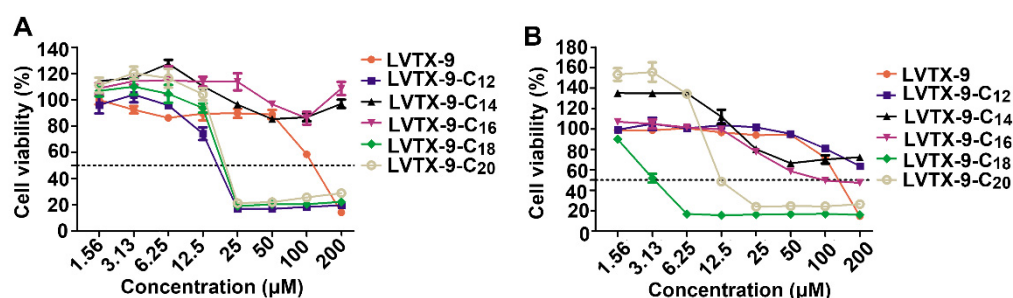

**Figure S1.** Cell viabilities of the peptides. Cytotoxic activities of LVTX-9 and five lipopeptides on L-929 cells in serum-containing (A) or serum-free (B) medium as determined by CCK-8 assay.

**Table S1.** Purification gradient of peptides.

| Time (min) | Flow Rate (mL/min) | A% | B%  |
|------------|--------------------|----|-----|
| 0          | 1                  | 80 | 20  |
| 4.9        | 1                  | 80 | 20  |
| 5          | 1                  | 70 | 30  |
| 40         | 1                  | 0  | 100 |
| 40.1       | 1                  | 0  | 100 |
| 43         | 1                  | 0  | 100 |
| 43.1       | 1                  | 80 | 20  |
| 46         | 1                  | 80 | 20  |
| 46.1       | 0.1                | 80 | 20  |

Wavelength: 215 nm/280 nm, column temperature:  $25 \pm 5$  °C, A: ddH<sub>2</sub>O (0.1% TFA), B: acetonitrile (0.1% TFA).
